# Supplementary material for: Insights into the opening of DNA-like double-stranded helices in lamivudine duplex IV and the first polymorph of this drug
Source: Royal Society of Chemistry journal article supplement (doi:10.1039/c6ce01613h), 2016-01-01
Supplement: c6ce01613h1.pdf [file c6ce01613h1.pdf]

## Supporting Information

# Insights into the opening of DNA-like double-stranded helices in lamivudine duplex IV and the first polymorph of the drug

*Cameron Capeletti da Silva and Felipe Terra Martins\**

Instituto de Química, Universidade Federal de Goiás, Campus Samambaia, CP 131, 74001-970, Goiânia, GO, Brazil

\*E-mail: felipe@ufg.br

### Content:

**1. Table S1** Crystal data and Refinement Parameters of the lamivudine crystal structures reported in this work.

**2. Figure S1** TG curve (black line), its derivative (red line) and DSC curve (blue line) of lamivudine duplex IV.

**Table S1.** Crystal data and refinement parameters of the lamivudine crystal structures reported in this work

| solid phases                                |                            | duplex IV                                                                                                                                                                                                                                            | lamivudine<br>hydrogen L-tartrate<br>monohydrate                                                                                         | lamivudine form<br>IV                                            |
|---------------------------------------------|----------------------------|------------------------------------------------------------------------------------------------------------------------------------------------------------------------------------------------------------------------------------------------------|------------------------------------------------------------------------------------------------------------------------------------------|------------------------------------------------------------------|
| structural formula                          |                            | 2(C <sub>8</sub> H <sub>12</sub> N <sub>3</sub> O <sub>3</sub> S),<br>2(C <sub>8</sub> H <sub>11</sub> N <sub>3</sub> O <sub>3</sub> S),<br>(C <sub>4</sub> H <sub>4</sub> O <sub>6</sub> ),<br>(CH <sub>4</sub> O), (H <sub>2</sub> O) <sup>a</sup> | (C <sub>8</sub> H <sub>12</sub> N <sub>3</sub> O <sub>3</sub> S),<br>(C <sub>4</sub> H <sub>4</sub> O <sub>6</sub> ), (H <sub>2</sub> O) | (C <sub>8</sub> H <sub>11</sub> N <sub>3</sub> O <sub>3</sub> S) |
| formula weight (g / mol)                    |                            | 1115.16                                                                                                                                                                                                                                              | 397.36                                                                                                                                   | 229.26                                                           |
| crystal system                              |                            | hexagonal                                                                                                                                                                                                                                            | monoclinic                                                                                                                               | triclinic                                                        |
| space group                                 |                            | <i>P</i> 6 <sub>1</sub> 22                                                                                                                                                                                                                           | <i>P</i> 2 <sub>1</sub>                                                                                                                  | <i>P</i> 1                                                       |
| unit cell dimensions                        | <i>a</i> (Å)               | 14.486(7)                                                                                                                                                                                                                                            | 5.136(8)                                                                                                                                 | 6.944(3)                                                         |
|                                             | <i>b</i> (Å)               | 14.486(7)                                                                                                                                                                                                                                            | 21.574(4)                                                                                                                                | 7.313(4)                                                         |
|                                             | <i>c</i> (Å)               | 40.741(2)                                                                                                                                                                                                                                            | 7.672(13)                                                                                                                                | 10.575(5)                                                        |
|                                             | $\alpha$ (deg)             | 90                                                                                                                                                                                                                                                   | 90                                                                                                                                       | 95.32(2)                                                         |
|                                             | $\beta$ (deg)              | 90                                                                                                                                                                                                                                                   | 98.937(5)                                                                                                                                | 102.21(2)                                                        |
|                                             | $\gamma$ (deg)             | 120                                                                                                                                                                                                                                                  | 90                                                                                                                                       | 106.87(2)                                                        |
| V (Å <sup>3</sup> )                         |                            | 7404.3(9)                                                                                                                                                                                                                                            | 839.8(2)                                                                                                                                 | 495.4(4)                                                         |
| Z                                           |                            | 6                                                                                                                                                                                                                                                    | 2                                                                                                                                        | 2                                                                |
| <i>d</i> (g.cm <sup>-3</sup> )              |                            | 1.501                                                                                                                                                                                                                                                | 1.571                                                                                                                                    | 1.537                                                            |
| absorption coeff. (mm <sup>-1</sup> )       |                            | 0.281                                                                                                                                                                                                                                                | 0.254                                                                                                                                    | 0.318                                                            |
| absorption correc.                          |                            | multi-scan                                                                                                                                                                                                                                           | multi-scan                                                                                                                               | multi-scan                                                       |
|                                             |                            | T <sub>min</sub> /T <sub>max</sub> = 0.769                                                                                                                                                                                                           | T <sub>min</sub> /T <sub>max</sub> = 0.819                                                                                               | T <sub>min</sub> /T <sub>max</sub> = 0.920                       |
| $\theta$ -range                             | for data collection (deg.) | 1.62-25.74                                                                                                                                                                                                                                           | 2.69-25.35                                                                                                                               | 2.00-25.39                                                       |
| index ranges                                |                            | -12 to 17                                                                                                                                                                                                                                            | -6 to 5                                                                                                                                  | -8 to 8                                                          |
|                                             |                            | -17 to 7                                                                                                                                                                                                                                             | -25 to 25                                                                                                                                | -7 to 8                                                          |
|                                             |                            | -49 to 48                                                                                                                                                                                                                                            | -9 to 8                                                                                                                                  | -12 to 12                                                        |
| data collected                              |                            | 32524                                                                                                                                                                                                                                                | 4688                                                                                                                                     | 4870                                                             |
| unique reflections                          |                            | 4718                                                                                                                                                                                                                                                 | 2959                                                                                                                                     | 2922                                                             |
| symmetry factor ( <i>R</i> <sub>int</sub> ) |                            | 0.0466                                                                                                                                                                                                                                               | 0.0454                                                                                                                                   | 0.0219                                                           |
| completeness to $\theta_{\max}$ (%)         |                            | 99.7                                                                                                                                                                                                                                                 | 98.3                                                                                                                                     | 99.4                                                             |

|                                                 |               |                 |                 |                 |
|-------------------------------------------------|---------------|-----------------|-----------------|-----------------|
| F(000)                                          |               | 3504            | 416             | 240             |
| parameters refined                              |               | 388             | 236             | 272             |
| GOF on F <sup>2</sup>                           |               | 1.044           | 0.986           | 1.043           |
| R <sub>I</sub> (all)                            |               | 0.040 (0.0467)  | 0.0628 (0.1107) | 0.0304 (0.0313) |
| wR <sub>2</sub> (all)                           |               | 0.0998 (0.1046) | 0.1643 (0.2282) | 0.0842 (0.0850) |
| largest diff. peak/ hole<br>(e/Å <sup>3</sup> ) |               | 0.304/ -0.288   | 0.521/ -0.537   | 0.334/ -0.185   |
| Absolute structure                              | Flack         | 0.02(9)         | 0.2(2)          | -0.02(7)        |
|                                                 | parameter     |                 |                 |                 |
|                                                 | Friedel pairs | 1876            | 1404            | 1112            |
| CCDC deposit no.                                |               | 1483546         | 1483547         | 1483545         |

---

<sup>a</sup> Water hydrogens of lamivudine duplex IV were not located in the refinement because a symmetry imposition has forced the water oxygen to lie on a special position of constrained 50% occupancy near to the lamivudine hydroxymethylene branch in the minor 30% occupancy sites.

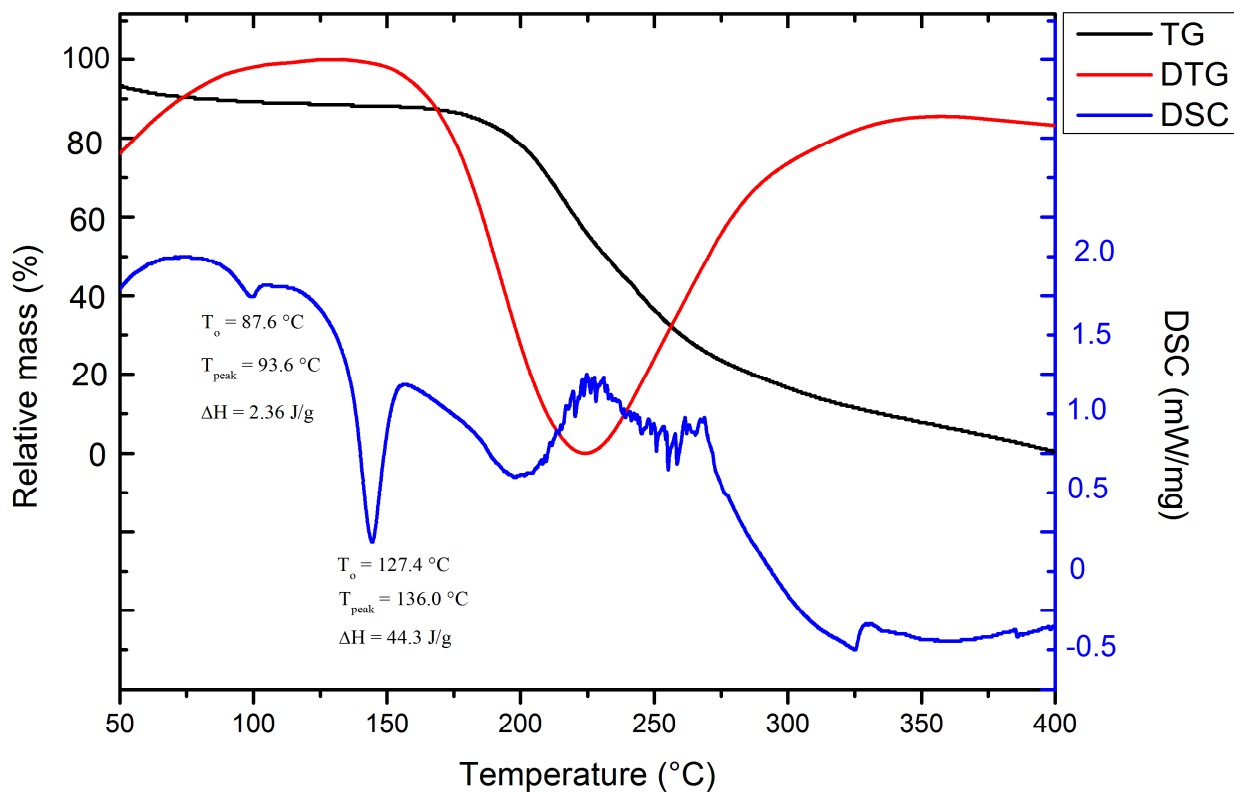

**Figure S1.** TG curve (black line), its derivative (red line) and DSC curve (blue line) of lamivudine duplex IV.
